# Supplementary material for: Modeling geographic distribution of arbuscular mycorrhizal fungi from molecular evidence in soils of Argentinean Puna using a maximum entropy approach
Source: PeerJ. 2023 Jan 12;11:e14651. doi: 10.7717/peerj.14651 (PMC9840858; doi:10.7717/peerj.14651)
Supplement: Supplemental Information 8 — Count = number of OTUs; Sum = sum of reads. [file peerj-11-14651-s008.xlsx]

## Sheet: Sheet1
Location	Phylum	count	sum
Abra_Pampa	k__Fungi	28	3539
Abra_Pampa	p__Ascomycota	373	51454
Abra_Pampa	p__Basidiomycota	69	22876
Abra_Pampa	p__Calcarisporiellomycota	2	41
Abra_Pampa	p__Entorrhizomycota	1	5
Abra_Pampa	p__Glomeromycota	20	1585
Abra_Pampa	p__Monoblepharomycota	1	3
Abra_Pampa	p__Mortierellomycota	1	4
Abra_Pampa	p__Mucoromycota	1	21
Chaupi_Rodeo_A	k__Fungi	42	1499
Chaupi_Rodeo_A	p__Aphelidiomycota	1	5
Chaupi_Rodeo_A	p__Ascomycota	351	41903
Chaupi_Rodeo_A	p__Basidiomycota	75	12592
Chaupi_Rodeo_A	p__Chytridiomycota	1	7
Chaupi_Rodeo_A	p__Glomeromycota	28	3548
Chaupi_Rodeo_A	p__Mortierellomycota	7	92
Chaupi_Rodeo_B	k__Fungi	53	1627
Chaupi_Rodeo_B	p__Aphelidiomycota	1	5
Chaupi_Rodeo_B	p__Ascomycota	365	39898
Chaupi_Rodeo_B	p__Basidiomycota	73	15685
Chaupi_Rodeo_B	p__Chytridiomycota	3	21
Chaupi_Rodeo_B	p__Glomeromycota	18	1965
Chaupi_Rodeo_B	p__Mortierellomycota	15	438
Chaupi_Rodeo_B	p__Olpidiomycota	1	7
Chaupi_Rodeo_C	k__Fungi	52	1485
Chaupi_Rodeo_C	p__Aphelidiomycota	3	32
Chaupi_Rodeo_C	p__Ascomycota	312	45880
Chaupi_Rodeo_C	p__Basidiomycota	51	8589
Chaupi_Rodeo_C	p__Chytridiomycota	2	33
Chaupi_Rodeo_C	p__Glomeromycota	13	3028
Chaupi_Rodeo_C	p__Monoblepharomycota	1	6
Chaupi_Rodeo_C	p__Mortierellomycota	17	530
Chaupi_Rodeo_C	p__Mucoromycota	2	19
Chaupi_Rodeo_C	p__Olpidiomycota	1	6
Chaupi_Rodeo_C	p__Rozellomycota	2	38
Dunas	k__Fungi	21	1275
Dunas	p__Ascomycota	202	62228
Dunas	p__Basidiomycota	67	15837
Dunas	p__Chytridiomycota	2	9
Dunas	p__Glomeromycota	1	152
Dunas	p__Mortierellomycota	3	19
Dunas	p__Mucoromycota	1	8
Puesto_del_Marqués	k__Fungi	28	1295
Puesto_del_Marqués	p__Aphelidiomycota	1	2
Puesto_del_Marqués	p__Ascomycota	348	46037
Puesto_del_Marqués	p__Basidiomycota	66	31805
Puesto_del_Marqués	p__Chytridiomycota	1	11
Puesto_del_Marqués	p__Glomeromycota	22	332
Puesto_del_Marqués	p__Mortierellomycota	7	46
Punto_Susques	k__Fungi	43	1543
Punto_Susques	p__Aphelidiomycota	1	11
Punto_Susques	p__Ascomycota	237	59720
Punto_Susques	p__Basidiomycota	82	17528
Punto_Susques	p__Calcarisporiellomycota	2	28
Punto_Susques	p__Glomeromycota	15	681
Punto_Susques	p__Mortierellomycota	1	17
Salinas_Grandes	k__Fungi	4	129
Salinas_Grandes	p__Ascomycota	42	30943
Salinas_Grandes	p__Basidiomycota	40	28245
Salinas_Grandes	p__Mortierellomycota	2	329
