# Supplementary material for: Modeling geographic distribution of arbuscular mycorrhizal fungi from molecular evidence in soils of Argentinean Puna using a maximum entropy approach
Source: PeerJ. 2023 Jan 12;11:e14651. doi: 10.7717/peerj.14651 (PMC9840858; doi:10.7717/peerj.14651)
Supplement: Supplemental Information 9 — Count = number of OTUs; Sum = sum of reads. [file peerj-11-14651-s009.xlsx]

## Sheet: Sheet1
Location	Sample	Phylum	count	sum
Abra_Pampa	Abra_A	Glomeromycota	4	394
Abra_Pampa	Abra_B	Glomeromycota	4	186
Abra_Pampa	Abra_C	Glomeromycota	9	92
Abra_Pampa	Abra_D	Glomeromycota	3	913
Chaupi_Rodeo_A	CRF_A	Glomeromycota	10	1847
Chaupi_Rodeo_A	CRM_A	Glomeromycota	6	1508
Chaupi_Rodeo_A	CRP_A	Glomeromycota	12	193
Chaupi_Rodeo_B	CRF_B	Glomeromycota	12	1833
Chaupi_Rodeo_B	CRM_B	Glomeromycota	6	132
Chaupi_Rodeo_C	CRF_C	Glomeromycota	4	2055
Chaupi_Rodeo_C	CRM_C	Glomeromycota	9	973
Dunas	Dunas_A	Glomeromycota	1	152
Puesto_del_Marqués	PdM_A	Glomeromycota	6	98
Puesto_del_Marqués	PdM_B	Glomeromycota	1	13
Puesto_del_Marqués	PdM_C	Glomeromycota	10	154
Puesto_del_Marqués	PdM_D	Glomeromycota	5	67
Punto_Susques	PS_A	Glomeromycota	4	221
Punto_Susques	PS_B	Glomeromycota	6	161
Punto_Susques	PS_C	Glomeromycota	2	201
Punto_Susques	PS_D	Glomeromycota	3	98
