# Supplementary material for: Modeling geographic distribution of arbuscular mycorrhizal fungi from molecular evidence in soils of Argentinean Puna using a maximum entropy approach
Source: PeerJ. 2023 Jan 12;11:e14651. doi: 10.7717/peerj.14651 (PMC9840858; doi:10.7717/peerj.14651)
Supplement: Supplemental Information 10 — Tests were performed on Glomeromycota reads among locations of the sampled areas (A) and among the levels of the following factors: soil disturbance (B), habitat/crop type (C), preceding crop/habitat in the previous year (D). Below (E) are shown the statistical significance of differences among samples. [file peerj-11-14651-s010.xlsx]

## Sheet: Sheet1
A
	Abra_Pampa	Chaupi_Rodeo_A	Chaupi_Rodeo_B	Chaupi_Rodeo_C	Dunas	Puesto_del_Marqués	Punto_Susques
Chaupi_Rodeo_A	0.28	-	-	-	-	-	-
Chaupi_Rodeo_B	1	1	-	-	-	-	-
Chaupi_Rodeo_C	1	1	1	-	-	-	-
Dunas	0.121	5.5e-06	0.011	0.026	-	-	-
Puesto_del_Marqués	1	0.121	1	1	0.298	-	-
Punto_Susques	1	0.035	1	1	0.895	1	-
Salinas_Grandes	0.113	1e-05	0.011	0.025	1	0.263	0.742
B
	corn	fava	potato	puna
fava	0.22973	-	-	-
potato	0.18108	3.7e-05	-	-
puna	0.04888	9.3e-08	1	-
salar	0.00058	3.6e-09	0.95767	0.15835
C
	cattle_llamas	Farming	llamas
Farming	0.21059	-	-
llamas	0.52854	1.3e-05	-
no_grazing	1	0.00047	1
D
	fava	Onion	Onion_Colza	puna
Onion	1	-	-	-
Onion_Colza	0.3738	0.1794	-	-
puna	1	1	0.3755	-
salar	0.0326	0.0376	1	0.0059
E
	Abra_A	Abra_B	Abra_C	Abra_D	CRF_A	CRF_B	CRF_C	CRM_A	CRM_B	CRM_C	CRP_A	CRP_B	CRP_C	PdM_A	PdM_B	PdM_C	PdM_D	PS_A	PS_B	PS_C	PS_D	Salar_A	Salar_B	Salar_C	Dunas_A	Dunas_B	Unto6_C
Abra_B	1	-	-	-	-	-	-	-	-	-	-	-	-	-	-	-	-	-	-	-	-	-	-	-	-	-	-
Abra_C	1	1	-	-	-	-	-	-	-	-	-	-	-	-	-	-	-	-	-	-	-	-	-	-	-	-	-
Abra_D	1	1	1	-	-	-	-	-	-	-	-	-	-	-	-	-	-	-	-	-	-	-	-	-	-	-	-
CRF_A	1	1	1	1	-	-	-	-	-	-	-	-	-	-	-	-	-	-	-	-	-	-	-	-	-	-	-
CRF_B	0.8477	0.5888	1	1	1	-	-	-	-	-	-	-	-	-	-	-	-	-	-	-	-	-	-	-	-	-	-
CRF_C	1	1	1	1	1	1	-	-	-	-	-	-	-	-	-	-	-	-	-	-	-	-	-	-	-	-	-
CRM_A	1	1	1	1	1	1	1	-	-	-	-	-	-	-	-	-	-	-	-	-	-	-	-	-	-	-	-
CRM_B	1	1	1	1	1	1	1	1	-	-	-	-	-	-	-	-	-	-	-	-	-	-	-	-	-	-	-
CRM_C	1	1	1	1	1	1	1	1	1	-	-	-	-	-	-	-	-	-	-	-	-	-	-	-	-	-	-
CRP_A	1	1	1	1	1	1	1	1	1	1	-	-	-	-	-	-	-	-	-	-	-	-	-	-	-	-	-
CRP_B	1	1	1	1	0.0123	0.0043	1	1	1	0.2629	1	-	-	-	-	-	-	-	-	-	-	-	-	-	-	-	-
CRP_C	1	1	1	1	0.0123	0.0043	1	1	1	0.2629	1	1	-	-	-	-	-	-	-	-	-	-	-	-	-	-	-
PdM_A	1	1	1	1	1	1	1	1	1	1	1	1	1	-	-	-	-	-	-	-	-	-	-	-	-	-	-
PdM_B	1	1	1	1	0.0378	0.0139	1	1	1	0.6691	1	1	1	1	-	-	-	-	-	-	-	-	-	-	-	-	-
PdM_C	1	1	1	1	1	1	1	1	1	1	1	1	1	1	1	-	-	-	-	-	-	-	-	-	-	-	-
PdM_D	1	1	1	1	1	0.5389	1	1	1	1	1	1	1	1	1	1	-	-	-	-	-	-	-	-	-	-	-
PS_A	1	1	1	1	1	0.8015	1	1	1	1	1	1	1	1	1	1	1	-	-	-	-	-	-	-	-	-	-
PS_B	1	1	1	1	1	1	1	1	1	1	1	1	1	1	1	1	1	1	-	-	-	-	-	-	-	-	-
PS_C	1	1	1	1	0.2015	0.0813	1	1	1	1	1	1	1	1	1	1	1	1	1	-	-	-	-	-	-	-	-
PS_D	1	1	1	1	0.6341	0.2747	1	1	1	1	1	1	1	1	1	1	1	1	1	1	-	-	-	-	-	-	-
Salar_A	1	1	1	1	0.0123	0.0043	1	1	1	0.2629	1	1	1	1	1	1	1	1	1	1	1	-	-	-	-	-	-
Salar_B	1	1	1	1	0.0123	0.0043	1	1	1	0.2629	1	1	1	1	1	1	1	1	1	1	1	1	-	-	-	-	-
Salar_C	1	1	1	1	0.0123	0.0043	1	1	1	0.2629	1	1	1	1	1	1	1	1	1	1	1	1	1	-	-	-	-
Dunas_A	1	1	1	1	0.0988	0.0383	1	1	1	1	1	1	1	1	1	1	1	1	1	1	1	1	1	1	-	-	-
Dunas_B	1	1	1	1	0.0123	0.0043	1	1	1	0.2629	1	1	1	1	1	1	1	1	1	1	1	1	1	1	1	-	-
Dunas_C	1	1	1	1	0.0123	0.0043	1	1	1	0.2629	1	1	1	1	1	1	1	1	1	1	1	1	1	1	1	1	-
Dunas_D	1	1	1	1	0.0123	0.0043	1	1	1	0.2629	1	1	1	1	1	1	1	1	1	1	1	1	1	1	1	1	1
