# Supplementary material for: Modeling geographic distribution of arbuscular mycorrhizal fungi from molecular evidence in soils of Argentinean Puna using a maximum entropy approach
Source: PeerJ. 2023 Jan 12;11:e14651. doi: 10.7717/peerj.14651 (PMC9840858; doi:10.7717/peerj.14651)
Supplement: Supplemental Information 11 — (A) Generalized Linear Mixed Model estimates of fixed effects generated through a Minimum Adequate Model (MAM) approach. Significance codes: *** ‘0’, ** ‘0.001’, * ‘0.01’, ⋅ ‘0.05’. (B) Spatial autocorrelation of data was accounted for by the nested random effect of samples within locations, showing variance greater than zero. Number of observations: 1,736. Groups: Sample:Location, 28; Location, 8. [file peerj-11-14651-s011.xlsx]

## Sheet: Sheet1
A
Fixed effects	Estimate	Std. error	z value	Pr(<|z|
(estimate)	-11.3223	0.9598	-11.796	< 2e-16	***
Salinity	-34.4291	2.2269	-15.461	< 2e-17	***
Organic matter	1.8595	0.6509	2.857	0.00428	**
B
Random effects
Groups	Name	Variance	Std.Dev.
Sample:Location	(intercept)	5.654	2.378
Location	(intercept)	1.853	1.361
