# Supplementary material for: Modeling geographic distribution of arbuscular mycorrhizal fungi from molecular evidence in soils of Argentinean Puna using a maximum entropy approach
Source: PeerJ. 2023 Jan 12;11:e14651. doi: 10.7717/peerj.14651 (PMC9840858; doi:10.7717/peerj.14651)
Supplement: Supplemental Information 12 — Variables importance was calculated by MaxEnt as a percent contribution and as a percent contribution after permutation of all variable values. (A) Cloglog output table (B) Cumulative output table. The considered variables were bio7, bio15, land cover, soil, elevation, nutrient retention, quantity of nutrients, vegetation type. AUC scores are 0.978 sd 0.005 for the cloglog model and 0.978 sd 0.007 for the cumulative model. [file peerj-11-14651-s012.xlsx]

## Sheet: Sheet1
A
Variable	Percent contribution	permutation importance
Bio7	53	63.9
Land cover	20.2	5.6
Soil type	15.6	16.5
Nutrient retention	3.9	2.8
Nutrient quantity	3.1	7.4
Elevation	2.5	2.1
Vegetation type	1.2	0.7
Bio15	0.4	0.8
B
Variable	Percent contribution	permutation importance
Bio7	41.7	48.6
Land cover	27.8	17.2
Soil type	11.7	16.6
Nutrient retention	6.7	7.4
Nutrient quantity	5.1	5.1
Elevation	4.8	0.7
Vegetation type	1.9	3.4
Bio15	0.3	1
