# Supplementary material for: Modeling geographic distribution of arbuscular mycorrhizal fungi from molecular evidence in soils of Argentinean Puna using a maximum entropy approach
Source: PeerJ. 2023 Jan 12;11:e14651. doi: 10.7717/peerj.14651 (PMC9840858; doi:10.7717/peerj.14651)
Supplement: Supplemental Information 14 [file peerj-11-14651-s014.xlsx]

## Sheet: MIMARKS.survey.soil.5.0
# This is a submission template for batch deposit of 'MIMARKS: survey, soil; version 5.0' samples to the NCBI BioSample database (https://www.ncbi.nlm.nih.gov/biosample/).
# GREEN fields are mandatory. Your submission will fail if any mandatory fields are not completed. If information is unavailable for any mandatory field, please enter 'not collected', 'not applicable' or 'missing' as appropriate.
# YELLOW fields are optional. Leave optional fields empty (or delete them) if no information is available.
# You can add any number of custom fields to fully describe your BioSamples, simply include them in the table.
# Hover over field name to view definition, or see https://www.ncbi.nlm.nih.gov/biosample/docs/attributes/.
# CAUTION: Be aware that Excel may automatically apply formatting to your data. In particular, take care with dates, incrementing autofills and special characters like / or -. Doublecheck that your text file is accurate before uploading to BioSample.
# TO MAKE A SUBMISSION:
# 1. Complete this template table.
# 2. Upload the file on the 'Attributes' tab of the BioSample Submission Portal at https://submit.ncbi.nlm.nih.gov/subs/biosample/.
# If you have any questions, please contact us at biosamplehelp@ncbi.nlm.nih.gov.
#
*sample_name	sample_title	bioproject_accession	replicate	*organism	*collection_date	*depth	*elev	*env_broad_scale	*env_local_scale	*env_medium	*geo_loc_name	*lat_lon	agrochem_addition	al_sat	al_sat_meth	altitude	annual_season_precpt	annual_season_temp	crop_rotation	cur_land_use	cur_vegetation	cur_vegetation_meth	drainage_class	extreme_event	extreme_salinity	fao_class	fire	flooding	heavy_metals	heavy_metals_meth	horizon	horizon_meth	isolation_source	link_addit_analys	link_class_info	link_climate_info	local_class	local_class_meth	microbial_biomass	microbial_biomass_meth	misc_param	omics_observ_id	ph	ph_meth	pool_dna_extracts	previous_land_use	previous_land_use_meth	profile_position	rel_to_oxygen
1S	Unto4A			soil metagenome	2018-03	10 cm	2990 m	ENVO:00010483	ENVO:00001998	GAZ:00056541	Cochinoca Department, Jujuy Province, Argentina	23.58342 S 65.90213 W
2S	Unto4B			soil metagenome	2018-03	10 cm	3420 m	ENVO:00010483	ENVO:00001998	GAZ:00056542	Cochinoca Department, Jujuy Province, Argentina	23.57765 S 65.91166 W
3S	Unto4C			soil metagenome	2018-03	10 cm	3426 m	ENVO:00010483	ENVO:00001998	GAZ:00056543	Cochinoca Department, Jujuy Province, Argentina	23.57243 S 65.91939 W
4S	Unto4D			soil metagenome	2018-03	10 cm	3424 m	ENVO:00010483	ENVO:00001998	GAZ:00056544	Cochinoca Department, Jujuy Province, Argentina	23.56726 S 65.92721 W
5S	Unto6A			soil metagenome	2018-03	10 cm	3486 m	ENVO:00010483	ENVO:00001998	GAZ:00056545	Cochinoca Department, Jujuy Province, Argentina	23.50345 S 66.04415 W
6S	Unto6B			soil metagenome	2018-03	10 cm	3460 m	ENVO:00010483	ENVO:00001998	GAZ:00056546	Cochinoca Department, Jujuy Province, Argentina	23.49712 S 66.05282 W
7S	Unto6C			soil metagenome	2018-03	10 cm	3455 m	ENVO:00010483	ENVO:00001998	GAZ:00056547	Cochinoca Department, Jujuy Province, Argentina	23.49183 S 66.06099 W
8S	Unto6D			soil metagenome	2018-03	10 cm	3459 m	ENVO:00010483	ENVO:00001998	GAZ:00056548	Cochinoca Department, Jujuy Province, Argentina	23.48685 S 66.06099 W
9S	PS_A			soil metagenome	2018-03	10 cm	3790 m	ENVO:00010483	ENVO:00001998	GAZ:00056549	Cochinoca Department, Jujuy Province, Argentina	23.43219 S 66.33559 W
10S	PS_B			soil metagenome	2018-03	10 cm	3799 m	ENVO:00010483	ENVO:00001998	GAZ:00056550	Cochinoca Department, Jujuy Province, Argentina	23.43836 S 66.32794 W
11S	PS_C			soil metagenome	2018-03	10 cm	3773 m	ENVO:00010483	ENVO:00001998	GAZ:00056551	Cochinoca Department, Jujuy Province, Argentina	23.42006 S 66.34891 W
12S	PS_D			soil metagenome	2018-03	10 cm	3786 m	ENVO:00010483	ENVO:00001998	GAZ:00056552	Cochinoca Department, Jujuy Province, Argentina	23.42489 S 66.34102 W
13S	PdM_A			soil metagenome	2018-03	10 cm	3505 m	ENVO:00010483	ENVO:00001998	GAZ:00056553	Cochinoca Department, Jujuy Province, Argentina	22.63753 S 65.69814 W
14S	PdM_B			soil metagenome	2018-03	10 cm	3502 m	ENVO:00010483	ENVO:00001998	GAZ:00056554	Cochinoca Department, Jujuy Province, Argentina	22.62797 S 65.69749 W
15S	PdM_C			soil metagenome	2018-03	10 cm	3504 m	ENVO:00010483	ENVO:00001998	GAZ:00056555	Cochinoca Department, Jujuy Province, Argentina	22.61834 S 65.69685 W
16S	PdM_D			soil metagenome	2018-03	10 cm	3503 m	ENVO:00010483	ENVO:00001998	GAZ:00056556	Cochinoca Department, Jujuy Province, Argentina	22.60988 S 65.69636 W
17S	CaI_A			soil metagenome	2018-03	10 cm	3486 m	ENVO:00010483	ENVO:00001998	GAZ:00056557	Cochinoca Department, Jujuy Province, Argentina	22.75507 S 65.76626 W
18S	CaI_B			soil metagenome	2018-03	10 cm	3485 m	ENVO:00010483	ENVO:00001998	GAZ:00056558	Cochinoca Department, Jujuy Province, Argentina	22.75084 S 65.75748 W
19S	CaI_C			soil metagenome	2018-03	10 cm	3493 m	ENVO:00010483	ENVO:00001998	GAZ:00056559	Cochinoca Department, Jujuy Province, Argentina	22.74532 S 65.75107 W
20S	CaI_D			soil metagenome	2018-03	10 cm	3492 m	ENVO:00010483	ENVO:00001998	GAZ:00056560	Cochinoca Department, Jujuy Province, Argentina	22.73894 S 65.74399 W
21S	CRM_A			soil metagenome	2018-03	10 cm	3504 m	ENVO:00010483	ENVO:00001998	ENVO:00005749	Chaupi Rodeo, Jujuy Province, Argentina	22.9374 S 65.3142 W
22S	CRM_B			soil metagenome	2018-03	10 cm	3520 m	ENVO:00010483	ENVO:00001998	ENVO:00005749	Chaupi Rodeo, Jujuy Province, Argentina	22.93334 S 65.31178 W
23S	CRM_C			soil metagenome	2018-03	10 cm	3527 m	ENVO:00010483	ENVO:00001998	ENVO:00005749	Chaupi Rodeo, Jujuy Province, Argentina	22.93175 S 65.31036 W
24S	CRP_A			soil metagenome	2018-03	10 cm	3496 m	ENVO:00010483	ENVO:00001998	ENVO:00005749	Chaupi Rodeo, Jujuy Province, Argentina	22.93757 S 65.31400 W
25S	CRP_B			soil metagenome	2018-03	10 cm	3520 m	ENVO:00010483	ENVO:00001998	ENVO:00005749	Chaupi Rodeo, Jujuy Province, Argentina	22.93317 S 65.31200 W
26S	CRP_C			soil metagenome	2018-03	10 cm	3524 m	ENVO:00010483	ENVO:00001998	ENVO:00005749	Chaupi Rodeo, Jujuy Province, Argentina	22.93169 S 65.31059 W
27S	CRPpapa_A			soil metagenome	2018-03	10 cm	3503 m	ENVO:00010483	ENVO:00001998	ENVO:00005749	Chaupi Rodeo, Jujuy Province, Argentina	22.93719 S 65.31422 W
28S	CRPpapa_B			soil metagenome	2018-03	10 cm	3522 m	ENVO:00010483	ENVO:00001998	ENVO:00005749	Chaupi Rodeo, Jujuy Province, Argentina	22.93328 S 65.31178 W
29S	CRPpapa_C			soil metagenome	2018-03	10 cm	3523 m	ENVO:00010483	ENVO:00001998	ENVO:00005749	Chaupi Rodeo, Jujuy Province, Argentina	22.93166 S 65.31050 W
[truncated: 22 more columns]
